# Supplementary material for: Combined PD-L1 and TIM-3 blockade improves the expansion of fit human CD8+ antigen-specific T cells for adoptive immunotherapy
Source: bioRxiv or medRxiv preprint supplement (doi:10.1101/2021.08.30.21262835), 2021-10-10
Supplement: Supplementary file [file media-1.pdf]

## **Supplementary Information for**

# **Combined PD-L1 and TIM-3 blockade improves the expansion of fit human CD8+ antigen-specific T cells for adoptive immunotherapy.**

Shirin Lak<sup>1</sup>, Valérie Janelle<sup>1</sup>, Anissa Djedid<sup>2</sup>, Gabrielle Boudreau<sup>1</sup>, Ann Brasey<sup>1,3</sup>, Véronique Lisi<sup>2</sup>, Cédric Carli<sup>1</sup>, Lambert Busque<sup>1,3,4,5</sup>, Vincent-Philippe Lavallée<sup>2,6,7</sup>, Jean-Sébastien Delisle<sup>1,4,5</sup>

<sup>1</sup> Centre de recherche de l'Hôpital Maisonneuve-Rosemont, Montréal, Qc, Canada

<sup>2</sup> Centre de recherche du CHU Sainte-Justine, Montréal, Qc, Canada

<sup>3</sup> Biomarker Unit, Centre C3i, Montréal, Qc, Canada

<sup>4</sup> Department of Medicine, Université de Montréal, Montréal, Qc, Canada

<sup>5</sup> Hematology-Oncology and Cell therapy Division, Hôpital Maisonneuve-Rosemont, Montréal, Qc, Canada

<sup>6</sup> Department of Pediatrics, Université de Montréal, Montréal, Qc, Canada

<sup>7</sup> Hematology-Oncology Division, CHU Sainte-Justine

\* Jean-Sébastien Delisle.

**Email:** [js.delisle@umontreal.ca](mailto:js.delisle@umontreal.ca)

**This PDF file includes:**

Tables S1 to S3

Figures S1 to S3

**Supplementary Table S1:** Single cell filtering results. Initial number of barcodes represents the output from CellRanger v3.0.2 while the number of cells after filtering corresponds to the cells kept for downstream analysis.

| <b>Sample</b> | <b>Initial number of barcodes</b> | <b>Number of cells after filtering</b> |
|---------------|-----------------------------------|----------------------------------------|
| CTRL1         | 20182                             | 12753                                  |
| CTRL2         | 8550                              | 1950                                   |
| CTRL3         | 27019                             | 9109                                   |
| DB1           | 19724                             | 10101                                  |
| DB2           | 11107                             | 2665                                   |
| DB3           | 30813                             | 8981                                   |

**Supplementary Table S2:** Gene list used for analysis.

| <b>TCA cycle</b> | <b>G2-M</b> | <b>Pentose Phosphate Pathway</b> |          | <b>Lipid mediators</b> |          | <b>Glycogen Metabolism</b> | <b>Glycogen Metabolism</b> | <b>Glucose Deprivation</b> |
|------------------|-------------|----------------------------------|----------|------------------------|----------|----------------------------|----------------------------|----------------------------|
| ACLY             | AURKA       | G6PD                             | ADIPOQ   | GH1                    | FASN     | GBE1                       | GBE1                       | NRN1                       |
| ACO1             | BIRC5       | G6PDH                            | TNFRSF9  | HGF                    | IRS2     | GYS1                       | GYS1                       | FAM129A                    |
| ACO2             | BUB1        | PGLS                             | AgRP     | ICAM1                  | KLF15    | GYS2                       | GYS2                       | IL23A                      |
| CS               | BUB1B       | PRPS1                            | ANGPT1   | IGFBP1                 | PPARG    | UGP2                       | UGP2                       | SPRY1                      |
| DLAT             | CCNA2       | PRPS1L1                          | ANGPT2   | IGFBP2                 | PPARGC1A | AGL                        | AGL                        | GADD45B                    |
| DLD              | CCNB1       | PRPS2                            | ANGPTL3  | IGFBP3                 | RETN     | PGM1                       | PGM1                       | HSPA1A                     |
| DLST             | CCNB2       | RBKS                             | ANGPTL4  | IGFBP4                 | SIRT3    | PGM2                       | PGM2                       | HSPA1B                     |
| FH               | CCNF        | RPE                              | ANGPTL6  | IGFBP6                 | SLC2A4   | PGM3                       | PGM3                       | GPNMB                      |
| IDH1             | CDC20       | RPIA                             | TNFSF13B | IGFBP7                 | SREBF1   | PYGL                       | PYGL                       | HAVCR2                     |
| IDH2             | CDC25B      | TALDO1                           | BMP4     | IL1b                   | ACACB    | PYGM                       | PYGM                       | SOAT2                      |
| IDH3A            | CDC25C      | TKT                              | CTSD     | IL6                    | AXIN1    | GSK3A                      | GSK3A                      | ADAMTS6                    |
| IDH3B            | CDK1        |                                  | CTSS     | IL10                   | CCND1    | GSK3B                      | GSK3B                      |                            |
| IDH3G            | CDKN2D      |                                  | CCL2     | IL11                   | CDK4     | PHKA1                      | PHKA1                      |                            |
| MDH1             | CENPA       |                                  | CCL5     | INS                    | CEBPB    | PHKB                       | PHKB                       |                            |
| MDH1B            | CENPF       |                                  | RARRES2  | LEP                    | CEBPD    | PHKG1                      | PHKG1                      |                            |
| MDH2             | CKS2        |                                  | CFD      | LIF                    | DKK1     | PHKG2                      | PHKG2                      |                            |
| OGDH             | KIF20A      |                                  | CRP      | LCN2                   | E2F1     |                            |                            |                            |
| PC               | PLK1        |                                  | CXCL8    | CSF1                   | FABP4    |                            |                            |                            |
| PCK1             | RACGAP1     |                                  | DPP4     | MIF                    | FASN     |                            |                            |                            |
| PCK2             | TOP2A       |                                  | ESM1     | MPO                    |          |                            |                            |                            |
| PDHA1            |             |                                  | S100A12  | GHRL                   |          |                            |                            |                            |
| PDHB             |             |                                  | AHSG     | GHSR                   |          |                            |                            |                            |
| SDHA             |             |                                  | FGF1     | LIPE                   |          |                            |                            |                            |
| SDHB             |             |                                  | FGF2     | LPL                    |          |                            |                            |                            |
| SDHD             |             |                                  | FGF21    | AGT                    |          |                            |                            |                            |
| SUCLA2           |             |                                  | FGF23    | CEBPA                  |          |                            |                            |                            |
| SUCLG1           |             |                                  | LGALS3   | CFD                    |          |                            |                            |                            |
| SUCLG2           |             |                                  | GCG      | FABP4                  |          |                            |                            |                            |

**Supplementary Table S2:** Gene list used for analysis (continued).

| <b>Glycolysis</b> | <b>Hypoxia-HIF regulated</b> |          | <b>Type II Interferon Response</b> | <b>Type I Interferon Response</b> | <b>Anti-inflammatory</b> | <b>Pro-inflammatory</b> | <b>Anergy</b> | <b>T- Cell Terminal Differentiation</b> |
|-------------------|------------------------------|----------|------------------------------------|-----------------------------------|--------------------------|-------------------------|---------------|-----------------------------------------|
| ALDOA             | LAMB1                        | IL10RA   | IFNG                               | IRF1                              | TIGIT                    | IL1A                    | EGR3          | TIGIT                                   |
| ALDOB             | ALDOA                        | IL15RA   | CXCL9                              | IFIH1                             | IDO1                     | IL1B                    | NR4A3         | PDCD1                                   |
| ALDOC             | ADM                          | ITGA6    | CXCL10                             | IFITM3                            | LGALS3                   | TNF                     | EGR1          | CD274                                   |
| BPGM              | BCL2                         | ITK      | STAT1                              | DDX58                             | PDCD1                    | IFNG                    | NR4A2         | CTLA4                                   |
| ENO1              | BCL2L1                       | JUND     | CD274                              | IFI44L                            | FOXP3                    | TBX21                   | EGR2          | LAG3                                    |
| ENO2              | FOS                          | IGHG4    | CDKN1A                             | IFI6                              | ENTPD1                   | CCL3                    | TNFSF11       | HAVCR2                                  |
| GALM              | JUN                          | MAP3K5   | MYC                                | IFITM2                            | CD274                    | CCL4                    | IRF4          | CD244                                   |
| GCK               | SRC                          | MAP2K1   | SMAD7                              | NAMPT                             | CSF2                     | PRF1                    | GCH1          | CD160                                   |
| GPI               | CREBBP                       | MAP2K2   | IRF1                               | OASL                              | CTLA4                    | GZMA                    | GADD45B       |                                         |
| HK2               | CCR6                         | MIF      | HLA-F                              | RTP4                              | CXCL12                   | GZMB                    | NFATC1        |                                         |
| HK3               | CEBPB                        | NFATC1   | HLA-G                              | TREX1                             | CXCL5                    | GZMK                    | JARID2        |                                         |
| PFKL              | ENO1                         | NFKB2    | HLA-A                              | ADAR                              | CXCL8                    | GZMH                    | SLC29A3       |                                         |
| PGAM2             | FAS                          | NFKBIE   | HLA-E                              | TENT5C                            | MIF                      | CD8A                    | HLF           |                                         |
| PGK1              | FASLG                        | TP53     | HLA-C                              | LY6E                              | PTGS2                    | FASLG                   | ZFP36L1       |                                         |
| PGK2              | FKBP4                        | TGM6     | HLA-B                              | MCOLN2                            | VEGFA                    | CCL2                    | RNF19A        |                                         |
| PGM1              | GAPDH                        | TNF      | HLA-DRA                            | APOBEC3G                          |                          | CCL20                   | ADORA2B       |                                         |
| PGM2              | SLC2A1                       | TNFRSF1B | HLA-DRB5                           | IL15                              |                          | IL2                     | NOCT          |                                         |
| PGM3              | SLC2A3                       | TRADD    | HLA-DRB1                           | ISG15                             |                          | IL6                     | DUSP6         |                                         |
| PKLR              | CSF2                         | TNFSF10  | HLA-DQA1                           | MX1                               |                          | IL12a                   | NDRG1         |                                         |
| TPI1              | IFNG                         | TRAP1    | HLA-DQB1                           | TLR3                              |                          | IL17a                   | ADORA2A       |                                         |
|                   | IFNB1                        | VEGFA    | HLA-DQB1-AS1                       |                                   |                          | IL23a                   | HSPA1A        |                                         |
|                   | IL13                         |          | HLA-DQA2                           |                                   |                          | PTGS2                   | PFKP          |                                         |
|                   | IL1R1                        |          | HLA-DQB2                           |                                   |                          | TLR4                    | FYN           |                                         |
|                   | IL2RA                        |          | HLA-DOB                            |                                   |                          | TNF                     | CTSE          |                                         |
|                   | IL4                          |          | HLA-DMB                            |                                   |                          |                         | ZNF629        |                                         |
|                   | IL5                          |          | HLA-DMA                            |                                   |                          |                         | F2R           |                                         |
|                   | IL6R                         |          | HLA-DOA                            |                                   |                          |                         | RNF128        |                                         |
|                   | CXCL8                        |          | HLA-DPA1                           |                                   |                          |                         | LAG3          |                                         |
|                   |                              |          | HLA-DPB1                           |                                   |                          |                         | RGS16         |                                         |
|                   |                              |          | HLA-DPA1                           |                                   |                          |                         | E2F1          |                                         |
|                   |                              |          |                                    |                                   |                          |                         | E2F2          |                                         |

**Supplementary Table S2:** Gene list used for analysis (continued).

| <b>T-Cell Proliferation</b> | <b>CD8 T-Cell Activation</b> | <b>Cytolytics effector pathway</b> | <b>Exhaustion</b> |
|-----------------------------|------------------------------|------------------------------------|-------------------|
| UBE2T                       | CD69                         | EOMES                              | TOX               |
| CENPU                       | CCR7                         | TBX21                              | TOX2              |
| CHEK1                       | CD27                         | GZMB                               | EOMES             |
| AURKA                       | BTLA                         | PRF1                               | TBX21             |
| CAPG                        | CD40LG                       | FASLG                              | NR4A2             |
| PCLAF                       | IL2RA                        | GZMH                               | PRDM1             |
| BUB1B                       | CD3E                         | GZMA                               | PDCD1             |
| CCNB2                       | CD47                         |                                    | HAVCR2            |
| DLC1                        | EOMES                        |                                    | CD244             |
| CDK1                        | GNLY                         |                                    | CD160             |
| CCNA2                       | GZMA                         |                                    | LAG3              |
| SERPINB2                    | GZMB                         |                                    | CD38              |
| PCNA                        | PRF1                         |                                    | ENTPD1            |
| TOP2A                       | IFNG                         |                                    | CD101             |
| STAT5A                      | CD8A                         |                                    | IFNG              |
| IL2                         | CD8B                         |                                    | TNF               |
|                             | FASLG                        |                                    | IL2               |
|                             | LAMP1                        |                                    | CTLA4             |
|                             | LAG3                         |                                    |                   |
|                             | CTLA4                        |                                    |                   |
|                             | HLA-DRA                      |                                    |                   |
|                             | TNFRSF4                      |                                    |                   |
|                             | ICOS                         |                                    |                   |
|                             | TNFRSF9                      |                                    |                   |
|                             | TNFRSF18                     |                                    |                   |

**Supplementary Table S3:** TCR alpha/beta chain sequences of the most abundant clonotypes across donors and conditions.

| Clonotype ID | nt_TRA                                              | nt_TRB                                                           | aa_TRA           | aa_TRB               | Donor   |
|--------------|-----------------------------------------------------|------------------------------------------------------------------|------------------|----------------------|---------|
| clonotype1   | TGTGCTGCCCTCATGGATAGCAACTATCAGT<br>TAATCTGG         | TGCGCCAGCAGTGATGACGGGATGAACACT<br>GAAGCTTTCTTT                   | CAALMDSNYQLIW    | CASSDDGMNTEAFF       | 1 and 2 |
| clonotype2   | TGTGCTGTGCTCATGGATAGCAACTATCAGT<br>TAATCTGG         | TGCGCCAGCAGTGGGGACGGTATGAACACT<br>GAAGCTTTCTTT                   | CAVLMSNYQLIW     | CASSGDMNTEAFF        | 3       |
| clonotype3   | TGTGCAATGAGCGCGGAGGAGGACATGCGC<br>TTT               | TGTGCCAGCAGCTCCCGGCTAGCGGGGATC<br>CAAACGAGCTCCTACAATGAGCAGTTCTTC | CAMSAEEDMRF      | CASSRSLAGIQTSSYNEQFF | 1 and 2 |
| clonotype4   | TGTGCAATGAGCGCGGAATCAAATCCGGGT<br>ATGCACTCAACTTC    | TGTGCCAGCAGCTTAGGGGGTTATGAGCAG<br>TTCTTC                         | CAMSAESNSGYALNF  | CASSLGGYEQFF         | 3       |
| clonotype5   | TGTGCAAGGGCCGGGGCTGGGAGTTACCAA<br>CTCACTTC          | TGCGCCAGCAGCTTGAGGGACAGCGGAGC<br>TCCTACGAGCAGTACTTC              | CAGAGAGSYQLTF    | CASSLEGQASSYEQYF     | 2       |
| clonotype6   | TGTGCTGTGACTAACTTTGAAATGAGAAATT<br>AACCTTT          | TGCGCCAGCAGCCAACACTACAGGGATACGAG<br>CAGTACTTC                    | CAVTNFGNEKLTf    | CASSQLQGYEQYF        | 2       |
| clonotype7   | TGTGCAATGAGAGAGCCTCTCACGGGAGGA<br>GGAACAAACTCACCTTT | TGTGCCAGCAGTGGACTAGCGATCTCCTACG<br>AGCAGTACTTC                   | CAMREPLTGGGNKLTf | CASSGLAISYEQYF       | 1       |

nt: nucleotide; aa: amino acid; TRA: TCR alpha chain; TRB: TCR beta chain.

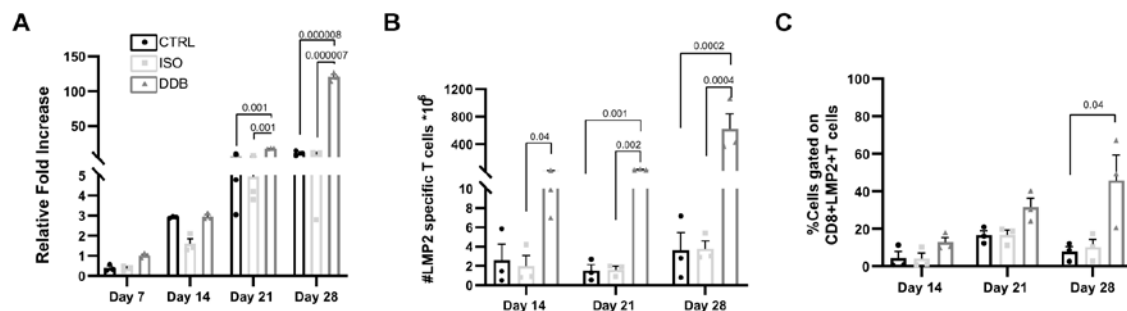

**Supplementary Figure S1. Validation of the DDB strategy using isotype control antibodies.**

(A) Cell expansion relative to input at the beginning of the culture ( $15 \times 10^6$ ) in function of time and culture condition; no antibodies (ctrl), isotypes (ISO) according to the Delayed double blockade (DDB) scheme or DDB. Absolute count (B) and percentage (C) of HLA-A0201-LMP2<sub>426-434</sub> (LMP2) multimer positive T cells in the same conditions and at the same time-points. 3 different donors, significant p-values are indicated, error bars indicate SEM.

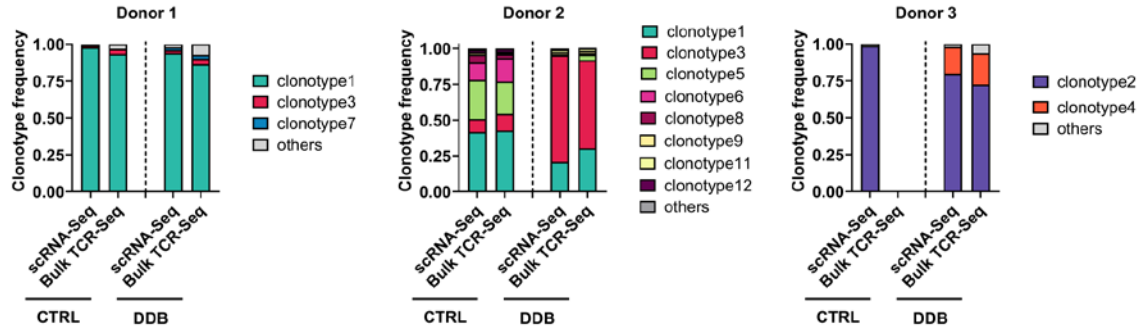

**Supplementary Figure S2. Correlation between clonotype determination using single-cell RNA sequencing (scRNA-seq) and bulk CDR3 beta-chain TCR sequencing.** Comparison of clonotype repertoire among sorted HLA-A0201-LMP2<sub>426-434</sub> multimer positive T cells at day 28 from the control condition (CTRL) and delayed double blockade (DDB) condition according to scRNA-seq or bulk CDR3 sequencing (bulk TCR-Seq) for each donor. The bulk TCR-Seq from the CTRL condition in Donor 3 was not considered due to poor RNA quality.



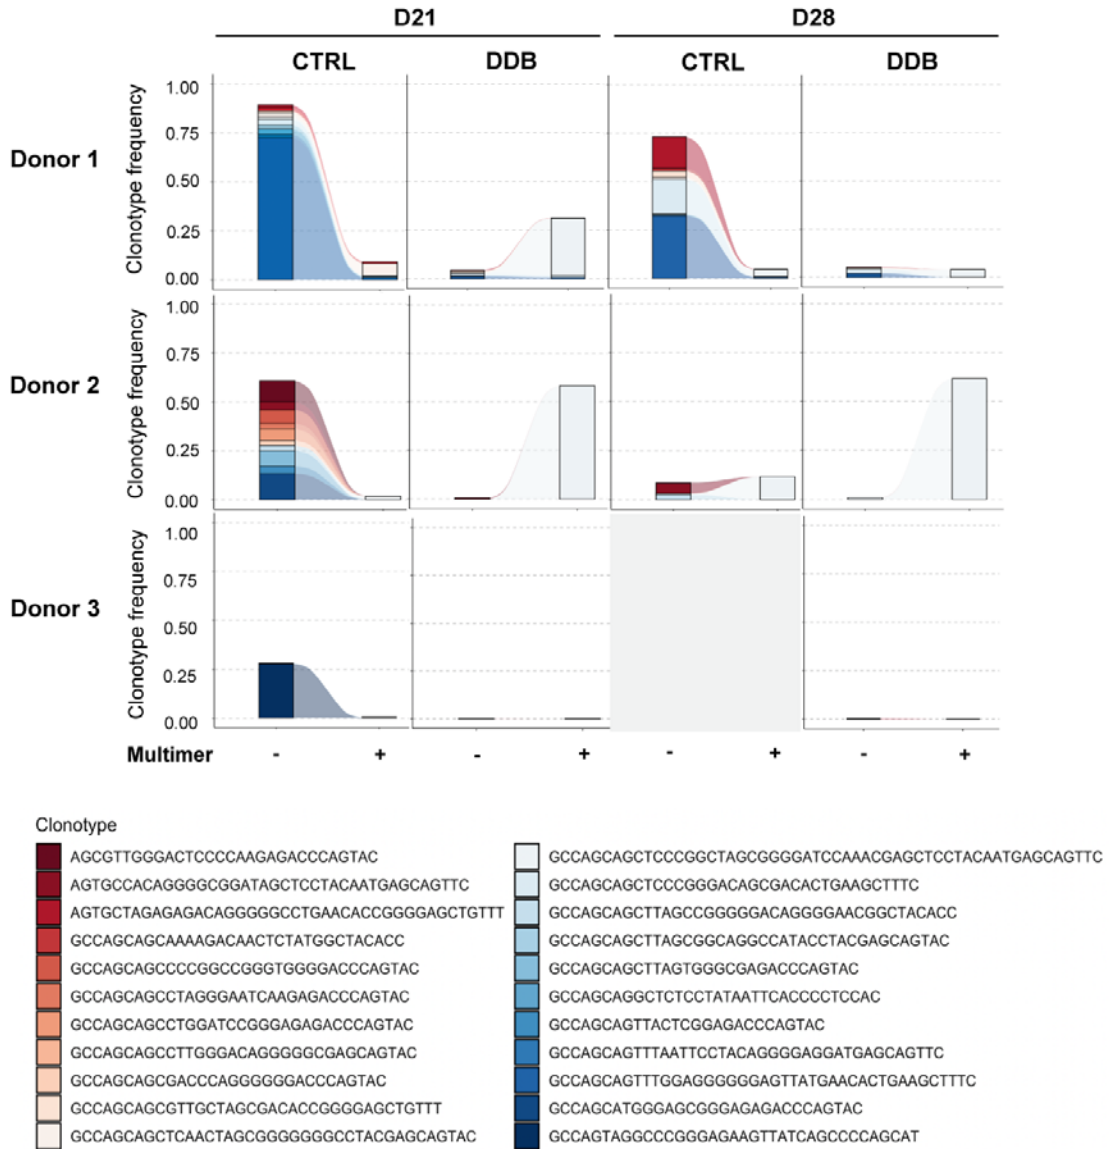

**Supplementary Figure S3. Limited overlap between HLA-A0201-LMP2<sub>426-434</sub> multimer positive and negative T cells.** Bulk CDR3 beta-chain TCR sequencing data from sorted multimer positive (+) and negative (-) fractions from all donors in both experimental condition (control - CTRL and delayed double blockade – DDB) at the day 21 and 28 time points showing limited clonotype overlap. Clonotypes present in both fractions (identified by beta-chain CDR3 sequences) are represented with none being abundant (>10%) in both fraction simultaneously. Due to poor RNA quality, the multimer-positive fraction of the control condition in Donor 3 could not be analyzed.
